# Supplementary material
Source: publisher figshare collection journal article supplement (https://karger.figshare.com/articles/dataset/_/5123812)
Supplement: Supplementary file 1 [file 1]

## Supplemental Table 1

Deep sequencing read counts brain and gonadal tissues of 3-year-old Atlantic halibut.

| Tissue type  | Total number<br>of reads | Adapter removed<br>reads | Reads longer<br>than 16 nts | miRNA<br>reads |
|--------------|--------------------------|--------------------------|-----------------------------|----------------|
| Ovary        | 5877347                  | 5655013                  | 4306116                     | 160465         |
| Testis       | 5821909                  | 5241973                  | 4061606                     | 151021         |
| Female brain | 5035191                  | 4283093                  | 2416260                     | 424132         |
| Male brain   | 3850623                  | 3403927                  | 1972788                     | 402902         |

Supplemental Table 2

Number of miRNA reads in 3-year-old Atlantic halibut gonads and brains.

| miRNA name  | Ovary | Testis | Female brain | Male brain |
|-------------|-------|--------|--------------|------------|
| let-7a      | 1117  | 2289   | 16352        | 14292      |
| let-7b      | 959   | 574    | 5132         | 4664       |
| let-7c      | 336   | 530    | 3478         | 3317       |
| let-7d      | 204   | 216    | 912          | 926        |
| let-7e      | 198   | 520    | 2898         | 3709       |
| let-7f      | 41    | 133    | 796          | 986        |
| let-7g      | 108   | 220    | 1845         | 1989       |
| let-7h      | 183   | 82     | 395          | 481        |
| let-7i      | 308   | 142    | 2722         | 2369       |
| let-7j      | 281   | 330    | 1742         | 1468       |
| miR-1       | 224   | 557    | 373          | 371        |
| miR-100     | 6270  | 3438   | 14015        | 14214      |
| miR-101a    | 77    | 131    | 701          | 768        |
| miR-101b    | 95    | 158    | 485          | 584        |
| miR-103     | 1527  | 1839   | 23845        | 17100      |
| miR-107     | 912   | 697    | 11850        | 9380       |
| miR-107b    | 148   | 35     | 777          | 765        |
| miR-10a     | 11    | 19     | 6            | 6          |
| miR-10b     | 396   | 513    | 21           | 21         |
| miR-10c     | 134   | 198    | 108          | 56         |
| miR-10d     | 112   | 199    | 58           | 32         |
| miR-122     | 8     | 2      | 3            | 5          |
| miR-124     | 52    | 29     | 40496        | 48538      |
| miR-125a    | 2098  | 1377   | 10950        | 10719      |
| miR-125b    | 5852  | 4955   | 36849        | 38129      |
| miR-125c    | 2299  | 1386   | 10229        | 11670      |
| miR-126     | 1388  | 2893   | 8750         | 5299       |
| miR-126-3p  | 3017  | 4841   | 16473        | 10892      |
| miR-126b    | 719   | 545    | 3616         | 2437       |
| miR-126b-3p | 952   | 945    | 4679         | 3134       |
| miR-128     | 239   | 95     | 4505         | 7174       |
| miR-129     | 0     | 0      | 738          | 796        |
| miR-129-3p  | 5     | 17     | 8296         | 10134      |
| miR-130a    | 309   | 210    | 680          | 282        |
| miR-130b    | 470   | 473    | 1247         | 959        |
| miR-130c    | 3020  | 4146   | 8874         | 7158       |
| miR-132     | 5     | 6      | 813          | 1240       |
| miR-132-3p  | 7     | 6      | 955          | 1382       |

|             |       |       |       |       |
|-------------|-------|-------|-------|-------|
| miR-133a    | 118   | 141   | 116   | 98    |
| miR-133a-3p | 171   | 331   | 197   | 174   |
| miR-133b    | 82    | 73    | 73    | 49    |
| miR-133b-3p | 82    | 74    | 74    | 50    |
| miR-135a    | 108   | 89    | 1263  | 1256  |
| miR-135b    | 9     | 5     | 493   | 541   |
| miR-135c    | 350   | 466   | 1293  | 1527  |
| miR-137     | 1     | 0     | 231   | 500   |
| miR-138     | 343   | 157   | 10986 | 13673 |
| miR-1388    | 27    | 43    | 37    | 58    |
| miR-1388-3p | 27    | 49    | 47    | 63    |
| miR-139     | 66    | 58    | 373   | 541   |
| miR-140     | 88    | 60    | 62    | 31    |
| miR-140-3p  | 425   | 476   | 543   | 260   |
| miR-141     | 13    | 29    | 11    | 5     |
| miR-142a-3p | 28    | 59    | 98    | 88    |
| miR-142a-5p | 26    | 24    | 22    | 23    |
| miR-142b-5p | 6     | 2     | 4     | 4     |
| miR-143     | 13892 | 6086  | 894   | 583   |
| miR-144     | 8     | 11    | 74    | 16    |
| miR-145     | 38266 | 47809 | 8048  | 4569  |
| miR-146a    | 133   | 438   | 227   | 221   |
| miR-146b    | 3     | 18    | 8     | 7     |
| miR-148     | 452   | 290   | 438   | 517   |
| miR-150     | 0     | 0     | 13    | 6     |
| miR-152     | 214   | 141   | 201   | 315   |
| miR-153a    | 14    | 13    | 647   | 755   |
| miR-153b    | 1     | 2     | 420   | 591   |
| miR-153c    | 1     | 6     | 225   | 297   |
| miR-15a     | 634   | 211   | 1725  | 1503  |
| miR-15a-3p  | 634   | 212   | 1725  | 1503  |
| miR-15b     | 382   | 459   | 598   | 523   |
| miR-16a     | 386   | 316   | 1741  | 1467  |
| miR-16b     | 431   | 592   | 5171  | 4443  |
| miR-16c     | 0     | 2     | 31    | 17    |
| miR-17a     | 4527  | 3225  | 3431  | 3422  |
| miR-17a-3p  | 4531  | 3225  | 3431  | 3423  |
| miR-181a    | 1067  | 631   | 2713  | 3172  |
| miR-181a-3p | 1502  | 917   | 4086  | 4468  |
| miR-181b    | 289   | 326   | 605   | 827   |
| miR-181c    | 8     | 11    | 31    | 53    |
| miR-182     | 9     | 3     | 45    | 81    |
| miR-182-3p  | 9     | 3     | 51    | 97    |
| miR-183     | 2     | 1     | 46    | 86    |
| miR-184     | 3     | 1     | 2     | 5     |
| miR-187     | 57    | 38    | 1613  | 1498  |

|             |       |      |       |      |
|-------------|-------|------|-------|------|
| miR-189     | 2     | 9    | 3     | 5    |
| miR-18a     | 117   | 185  | 239   | 305  |
| miR-18b     | 3     | 4    | 6     | 4    |
| miR-18b-3p  | 3     | 4    | 8     | 4    |
| miR-18c     | 1     | 1    | 2     | 7    |
| miR-190     | 44    | 44   | 56    | 97   |
| miR-192     | 49    | 3    | 50    | 9    |
| miR-193a    | 109   | 74   | 56    | 93   |
| miR-196a    | 17    | 26   | 0     | 0    |
| miR-199     | 9958  | 7197 | 1180  | 717  |
| miR-199-3p  | 13019 | 9156 | 1497  | 954  |
| miR-19a     | 493   | 846  | 1495  | 1067 |
| miR-19a-3p  | 502   | 852  | 1497  | 1068 |
| miR-19b     | 4893  | 7702 | 11115 | 6567 |
| miR-19b-3p  | 4895  | 7702 | 11122 | 6570 |
| miR-19c     | 882   | 1754 | 3421  | 2112 |
| miR-19d     | 1178  | 1891 | 2488  | 1344 |
| miR-200a    | 40    | 101  | 21    | 6    |
| miR-200b    | 5     | 18   | 6     | 2    |
| miR-200c    | 5     | 13   | 2     | 0    |
| miR-202     | 19    | 39   | 0     | 0    |
| miR-202-3p  | 8622  | 3648 | 2     | 11   |
| miR-203a    | 27    | 34   | 38    | 15   |
| miR-203b-3p | 7     | 4    | 4     | 4    |
| miR-204     | 167   | 98   | 867   | 1149 |
| miR-205     | 48    | 40   | 38    | 29   |
| miR-206     | 9     | 6    | 17    | 2    |
| miR-20a     | 892   | 821  | 776   | 1205 |
| miR-20a-3p  | 898   | 827  | 785   | 1212 |
| miR-20b     | 225   | 303  | 237   | 185  |
| miR-21      | 4117  | 2453 | 4889  | 4819 |
| miR-210     | 1447  | 1298 | 2716  | 2271 |
| miR-210-3p  | 1943  | 2235 | 4567  | 3811 |
| miR-212     | 3     | 0    | 213   | 322  |
| miR-214     | 1287  | 1112 | 129   | 49   |
| miR-216a    | 1     | 0    | 72    | 71   |
| miR-216b    | 14    | 1    | 324   | 254  |
| miR-217     | 4     | 5    | 356   | 334  |
| miR-2184    | 388   | 249  | 83    | 61   |
| miR-2187-3p | 1     | 4    | 3     | 5    |
| miR-2188    | 386   | 199  | 6560  | 1588 |
| miR-2188-3p | 386   | 200  | 6574  | 1589 |
| miR-218a    | 213   | 357  | 2441  | 1903 |
| miR-218b    | 62    | 93   | 1319  | 696  |
| miR-219     | 0     | 2    | 132   | 336  |
| miR-221     | 209   | 77   | 944   | 1504 |

|            |      |      |       |      |
|------------|------|------|-------|------|
| miR-222    | 273  | 107  | 894   | 1419 |
| miR-223    | 327  | 340  | 956   | 1088 |
| miR-22a    | 2914 | 2445 | 6149  | 5380 |
| miR-22b    | 64   | 40   | 198   | 141  |
| miR-23a    | 682  | 769  | 513   | 531  |
| miR-23b    | 627  | 1156 | 1943  | 2098 |
| miR-24     | 2480 | 5661 | 10400 | 7748 |
| miR-25     | 792  | 413  | 349   | 272  |
| miR-26a    | 2485 | 3165 | 6724  | 8042 |
| miR-26b    | 1019 | 1872 | 3679  | 4448 |
| miR-27a    | 222  | 73   | 93    | 119  |
| miR-27b    | 411  | 117  | 302   | 453  |
| miR-27c    | 257  | 120  | 71    | 73   |
| miR-27d    | 79   | 32   | 139   | 189  |
| miR-27e    | 98   | 60   | 125   | 178  |
| miR-29a    | 2290 | 604  | 7990  | 8521 |
| miR-29b    | 91   | 171  | 2522  | 2787 |
| miR-301a   | 47   | 139  | 516   | 558  |
| miR-301b   | 27   | 94   | 298   | 483  |
| miR-301c   | 104  | 252  | 1235  | 1366 |
| miR-30b    | 492  | 332  | 936   | 1077 |
| miR-30c    | 586  | 328  | 1430  | 1431 |
| miR-30d    | 112  | 228  | 530   | 548  |
| miR-30e    | 252  | 481  | 1245  | 1335 |
| miR-30e-3p | 437  | 617  | 1696  | 1814 |
| miR-31     | 8    | 5    | 2     | 1    |
| miR-338    | 822  | 559  | 8933  | 8165 |
| miR-34     | 1831 | 500  | 6127  | 4833 |
| miR-34b    | 0    | 0    | 67    | 63   |
| miR-365    | 29   | 24   | 46    | 113  |
| miR-375    | 2    | 4    | 26    | 2    |
| miR-430c   | 6    | 22   | 0     | 18   |
| miR-451    | 115  | 238  | 7391  | 1564 |
| miR-454b   | 1    | 1    | 8     | 14   |
| miR-455    | 41   | 45   | 20    | 30   |
| miR-455b   | 13   | 16   | 6     | 12   |
| miR-456    | 66   | 22   | 387   | 418  |
| miR-458    | 42   | 14   | 310   | 410  |
| miR-460-3p | 1    | 1    | 35    | 38   |
| miR-460-5p | 15   | 15   | 254   | 304  |
| miR-462    | 189  | 108  | 86    | 105  |
| miR-489    | 1    | 12   | 173   | 186  |
| miR-722    | 0    | 0    | 1     | 8    |
| miR-724    | 2    | 2    | 153   | 343  |
| miR-727    | 2    | 3    | 44    | 70   |
| miR-727-3p | 13   | 14   | 141   | 206  |

|          |      |      |       |       |
|----------|------|------|-------|-------|
| miR-728  | 1    | 4    | 23    | 50    |
| miR-730  | 331  | 476  | 1751  | 1598  |
| miR-731  | 117  | 79   | 39    | 30    |
| miR-733  | 358  | 93   | 17    | 3     |
| miR-737  | 2    | 1    | 9     | 8     |
| miR-7a   | 108  | 75   | 547   | 1428  |
| miR-9    | 23   | 26   | 16773 | 18846 |
| miR-92a  | 1489 | 620  | 776   | 864   |
| miR-92b  | 3    | 2    | 4     | 1     |
| miR-93   | 267  | 312  | 168   | 257   |
| miR-9-3p | 6034 | 2876 | 29338 | 31707 |
| miR-99   | 4249 | 1914 | 9300  | 8279  |

---

Supplemental Table 3

Tissue- and sex-biased miRNAs in Atlantic halibut.

| Brain-biased | Gonad-biased<br>specific | Female brain-<br>biased | Male brain-<br>biased | Ovary-<br>biased | Testis- biased |
|--------------|--------------------------|-------------------------|-----------------------|------------------|----------------|
| miR-124      | miR-10b                  | let-7f                  | let-7i                | miR-25           | miR-146a       |
| miR-129-3p   | miR-10d                  | let-7g                  | miR-107b              | miR-27a          | miR-133a-3p    |
| miR-129      | miR-199-3p               | miR-218b                | miR-135a              | miR-27c          |                |
| miR-132      | miR-202-3p               | miR-451                 | miR-221               | miR-462          |                |
| miR-135b     | miR-214                  |                         | miR-222               | miR-146a         |                |
| miR-153a     | miR-2184                 |                         | miR-456               |                  |                |
| miR-153b     | miR-733                  |                         | miR-458               |                  |                |
| miR-187      |                          |                         | miR-7a                |                  |                |
| miR-9        |                          |                         |                       |                  |                |
| miR-9-3p     |                          |                         |                       |                  |                |
| miR-137      |                          |                         |                       |                  |                |

Supplemental Table 4

Tissue expression of miRNAs in various vertebrates. Comparison was performed by blasting Atlantic halibut miRNA sequences to miRBase 18 ([www.mirbase.org](http://www.mirbase.org)) and searching published results.

|          | Halibut tissue | Method                                              | Species and expression localization                                                                                         | Reference                       |
|----------|----------------|-----------------------------------------------------|-----------------------------------------------------------------------------------------------------------------------------|---------------------------------|
| miR-9*   | Brain          | Cloning, deep sequencing                            | Mouse (brain)                                                                                                               | [1, 2]                          |
| miR-129  | Brain          | Cloning, deep sequencing, northern blot, microarray | Mouse (brain, pancreatic cells, gonads)<br>Rat (brain, testis, kidney)                                                      | [1-6]<br>[7]                    |
| miR-137  | Brain          | Cloning, deep sequencing                            | Mouse (brain, testis, pancreatic cells)<br>Rat (brain, testis)<br>Platypus (brain, testis)<br>Lamprey (brain, mouth, heart) | [1-3]<br>[7]<br>[8]<br>[9]      |
| mir-153b | Brain          | Deep sequencing                                     | Mouse (brain)                                                                                                               | [2]                             |
| miR-212  | Brain          | Deep sequencing                                     | Mouse (brain, ovary)<br>Lamprey (brain)                                                                                     | [2, 10]<br>[9]                  |
| mir-219  | Brain          | Deep sequencing                                     | Mouse (brain, gonads)<br>Platypus (brain, testis)<br>Chicken (brain, testis)<br>Lamprey (brain)                             | [2, 7, 10]<br>[8]<br>[8]<br>[9] |
| miR-202  | Gonads         | Deep sequencing, Cloning                            | Chicken (gonads)<br>Mouse (gonads)<br>Rodents and Human (gonads)                                                            | [11]<br>[2, 10]<br>[5]          |
| miR-202* | Gonads         | Deep sequencing                                     | Mouse (gonads)                                                                                                              | [2]                             |

## References:

1. Lagos-Quintana, M., et al., *Identification of tissue-specific microRNAs from mouse*. Curr Biol, 2002. **12**: p. 735 - 739.
2. Chiang, H.R., et al., *Mammalian microRNAs: experimental evaluation of novel and previously annotated genes*. Genes & Development, 2010. **24**(10): p. 992-1009.
3. Poy, M.N., et al., *A pancreatic islet-specific microRNA regulates insulin secretion*. Nature, 2004. **432**(7014): p. 226-230.
4. Kim, J., et al., *Identification of many microRNAs that copurify with polyribosomes in mammalian neurons*. Proceedings of the National Academy of Sciences, 2004. **101**(1): p. 360-365.
5. Landgraf, P., et al., *A mammalian microRNA expression atlas based on small RNA library sequencing*. Cell, 2007. **129**(7): p. 1401-1414.
6. Miska, E.A., et al., *Microarray analysis of microRNA expression in the developing mammalian brain*. Genome Biology, 2004. **5**(9).
7. Linsen, S., et al., *Small RNA expression and strain specificity in the rat*. BMC Genomics, 2010. **11**(1): p. 249.
8. Murchison, E., et al., *Conservation of small RNA pathways in platypus*. Genome Res, 2008. **18**: p. 995 - 1004.
9. Heimberg, A.M., et al., *microRNAs reveal the interrelationships of hagfish, lampreys, and gnathostomes and the nature of the ancestral vertebrate*. Proceedings of the National Academy of Sciences, 2010.
10. Ahn, H.W., et al., *MicroRNA transcriptome in the newborn mouse ovaries determined by massive parallel sequencing*. Molecular Human Reproduction, 2010. **16**(7): p. 463-471.
11. Bannister, S.C., et al., *Sexually Dimorphic MicroRNA Expression During Chicken Embryonic Gonadal Development*. Biology of Reproduction, 2009. **81**(1): p. 165-176.
